# Supplementary material for: Misfolded plasma protein signature in carotid artery dissection
Source: Research Square preprint supplement (doi:10.21203/rs.3.rs-7215137/v1), 2025-08-21
Supplement: Supplementary file 1 [file 0d4e0b0ad2081679fe664897.docx]

Supplementary Information

Misfolded plasma protein signature in carotid artery dissection

**Supplementary Table S1.** *LC-MS/MS intensities of proteins (Uniprot IDs: P02649, P15924, P01042, P02655, P02775) and their corresponding logistic regression coefficients were used to calculate predicted probabilities (Prob.) for each sample, representing the likelihood of belonging to the CAD patient group. These values were obtained as part of a LASSO analysis used to construct a biomarker panel distinguishing CAD patients (patient) from healthy controls (donor).*

**Supplementary Table S1**
